# Supplementary material for: Uveal melanoma immunogenomics predict immunotherapy resistance and susceptibility
Source: PubMed Central journal article supplement (PMC11021475; doi:10.1038/s41467-024-46906-4), 2024-04-16
Supplement: 41467_2024_46906_MOESM3_ESM.pdf [file 41467_2024_46906_MOESM3_ESM.pdf]

## **Description of Additional Supplementary Files:**

**Supplementary Data 1:** (related to Fig. 1) Summary of clinicogenomic variables.

**Supplementary Data 2:** (related to Fig. 1) Statistical testing of TMB associations with clinicogenomic variables.

**Supplementary Data 3:** (related to Fig. 2) Hallmark enrichment scores and PCA coordinates for individual UM metastases.

**Supplementary Data 4:** (related to Fig. 2,3) UMIS gene list.

**Supplementary Data 5:** (related to Fig. 1.3) Statistical testing of UMIS associations with clinicogenomic variables.

**Supplementary Data 6:** (related to Fig. 1,3) Statistical testing of UMIS associations with frequent gene mutations.

**Supplementary Data 7:** (related to Fig. 1,3) Statistical testing of UMIS associations with copy number alterations.

**Supplementary Data 8:** (related to Fig. 4) Single cell transcriptomic immune atlas marker genes.

**Supplementary Data 9:** (related to Fig. 4) Levels of immune cellular labels in single cell transcriptomic analysis.

**Supplementary Data 10:** (related to Fig. 4) Differential gene expression of lymphoid cells in high UMIS versus low UMIS metastases using the Wilcoxon rank-sum test (two-tailed).

**Supplementary Data 11:** (related to Fig. 4) Differential gene expression of myeloid cells in high UMIS versus low UMIS metastases using the Wilcoxon rank-sum test (two-tailed).

**Supplementary Data 12:** (related to Fig. 4) Differential gene expression of tumor cells in high UMIS versus low UMIS metastases using the Wilcoxon rank-sum test (two-tailed).

**Supplementary Data 13:** (related to Fig. 1,3,5) Statistical testing of tumor reactive TIL associations with clinicogenomic variables.

**Supplementary Data 14:** (related to Fig. 1,3,5) Statistical testing of tumor reactive TIL associations with frequent gene mutations.

**Supplementary Data 15:** (related to Fig. 1,3,5) Statistical testing of tumor reactive TIL associations with copy number alterations.

**Supplementary Data 16:** (related to Fig. 5) Gene expression profiles in benchmarking analysis.

**Supplementary Data 17:** (related to Methods) Listing of reagents, instruments, and antibodies.

**Supplementary Data 18:** (related to Methods) Listing of software.
